# Supplementary material for: Comparative techno-economic and life-cycle analysis of precious versus non-precious metal electrocatalysts: the case of PEM fuel cell cathodes
Source: Royal Society of Chemistry journal article supplement (doi:10.1039/d3gc03206j), 2023-01-01
Supplement: d3gc03206j1.pdf [file d3gc03206j1.pdf]

**Supporting Information:**

**Comparative techno-economic and life-cycle analysis of precious versus non-precious metal electrocatalysts: The case of PEM fuel cell cathodes**

Angus Pedersen<sup>a,b,†</sup>, Jinil Pandya<sup>b,†</sup>, Grazia Leonzio<sup>b,c</sup>, Alexey Serov<sup>d</sup>, Andrea Bernardi<sup>b,e</sup>, Ifan E. L. Stephens<sup>a</sup>, Maria-Magdalena Titirici<sup>b,f</sup>, Camille Petit<sup>b</sup>, Benoît Chachuat<sup>b,e,\*</sup>

---

<sup>a</sup>Department of Materials, Royal School of Mines, Imperial College London, London SW7 2AZ, England.

<sup>b</sup>Department of Chemical Engineering, Imperial College London, London SW7 2AZ, England.

<sup>c</sup>Department of Mechanical, Chemical and Materials Engineering, University of Cagliari, via Marengo 2, 09123 Cagliari, Italy.

<sup>d</sup>Electrification and Energy Infrastructures Division, Oak Ridge National Laboratory, Oak Ridge, TN, USA.

<sup>e</sup>The Sargent Centre for Process Systems Engineering, Imperial College London, SW7 2AZ, London, England.

<sup>f</sup>Advanced Institute for Materials Research (WPI-AIMR), Tohoku University, 2-1-1 Katahira, Aobaku, Sendai, Miyagi, 980-8577, Japan.

## A. Life Cycle Inventory

### *Pt/C loading*

For the baseline scenario the required amount of catalyst was calculated as follows:

Number of cells used were 380 with an active area of 185 cm<sup>2</sup> per cell.

The area to be coated is calculated by:

$$\text{Total area coated with catalyst} = 380 \times 185 \text{ cm}^2 = 70,300 \text{ cm}^2$$

With a loading of 0.125 mg cm<sup>-2</sup> of Pt this gives total amount of Pt loading of:

$$70,300 \text{ cm}^2 \times 0.125 \frac{\text{mg}_{\text{Pt}}}{\text{cm}^2} = 8.79 \text{ g}_{\text{Pt}}$$

The Pt/C catalyst is made up of 46 wt.% Pt, therefore Pt/C:

$$\frac{8.79 \text{ g}}{0.46 \text{ wt. \%}} \approx 20 \text{ g}_{\text{Pt/C}}$$

### *Fe-N-C loading*

The total required Fe-N-C for 80 kW PEMFC is based on power density of 290 mW cm<sup>-2</sup> at 0.657 V

with loading of 2.5 mg<sub>FeNC</sub> cm<sup>-2</sup>:

$$\frac{80,000 \text{ W} \times 0.0025 \text{ g cm}^{-2}}{0.290 \text{ W cm}^{-2}} = 690 \text{ g}_{\text{FeNC}}$$

### *Pt/C Manufacturing calculations*

Chloroplatinic acid (CPA) calculations were based on the molar ratios as shown in **Equation S1**:

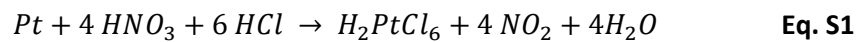

Molecular weights were used to calculate the amount of mass required to produce 1.23 kg of CPA.

**Table S1.** Chloroplatinic acid production inputs.

| <b>Inputs</b>                                           |        |      |                                                                       |
|---------------------------------------------------------|--------|------|-----------------------------------------------------------------------|
| Flow                                                    | Amount | Unit | Provider/Category                                                     |
| Hydrochloric acid, without water, in 30% solution state | 0.66   | kg   | Market for Hydrochloric acid, APOS, U - RER                           |
| Nitric acid, without water, in 50% solution state       | 0.76   | kg   | Market for nitric acid, APOS, U - RER                                 |
| Platinum                                                | 0.64   | kg   | Market for platinum, APOS, U - GLO                                    |
| <b>Outputs</b>                                          |        |      |                                                                       |
| Chloroplatinic acid                                     | 1.23   | kg   |                                                                       |
| Nitrogen dioxide, emission to water                     | 0.55   | kg   |                                                                       |
| Wastewater, average                                     | 216    | mL   | market for wastewater, average - APOS, U - Europe without Switzerland |

The energy input for CPA production process is ignored in this study as this was considered negligible compared to the total used in the catalyst production process.

**Table S2.** Pt/C production inputs for 20 g baseline scenario with provider of LCA data.

| <b>Inputs</b>                                           |        |      |                                                                       |
|---------------------------------------------------------|--------|------|-----------------------------------------------------------------------|
| Flow                                                    | Amount | Unit | Provider                                                              |
| Acetone                                                 | 768    | g    | Market for acetone, APOS, U - RER                                     |
| Carbon black                                            | 10     | g    | Market for carbon black, APOS, U - GLO                                |
| Chloroplatinic acid                                     | 17.7   | g    | Table S1                                                              |
| Electricity                                             | 4.43   | MJ   | Market group for electricity, medium voltage, APOS, U - GLO           |
| Ethylene glycol                                         | 2.56   | kg   | Market for ethylene glycol, APOS, U - GLO                             |
| Hydrochloric acid, without water, in 30% solution state | 318    | g    | Market for hydrochloric acid, APOS, U - RER                           |
| Sodium hydroxide                                        | 23     | g    | Market for sodium hydroxide, APOS, U - RER                            |
| Water, deionised                                        | 39.7   | kg   | Market for water, deionised, APOS, U - Europe without Switzerland     |
| <b>Outputs</b>                                          |        |      |                                                                       |
| Acetone, emission to water                              | 768    | g    |                                                                       |
| Hydrochloric acid, emission to water                    | 318    | g    |                                                                       |
| Pt/C catalyst                                           | 20     | g    | This Table.                                                           |
| Sodium hydroxide, emission to air                       | 23.3   | g    |                                                                       |
| Wastewater, average                                     | 39.7   | kg   | market for wastewater, average - APOS, U - Europe without Switzerland |
| Ethylene glycol                                         | 2.56   | kg   |                                                                       |

### *Fe-N-C manufacturing inputs*

**Table S3.** Production process for iron nitrate nonahydrate.

| <b>Inputs</b>            |        |      |                                          |
|--------------------------|--------|------|------------------------------------------|
| Flow                     | Amount | Unit | Provider                                 |
| Iron ore                 | 0.14   | g    | Market for iron ore, APOS U - GLO        |
| Sodium nitrate           | 0.46   | g    | Market for sodium nitrate, APOS U - GLO  |
| Water deionised          | 0.40   | g    | Market for deionised water, APOS U - RoW |
| <b>Outputs</b>           |        |      |                                          |
| Iron nitrate nonahydrate | 1      | g    |                                          |

**Table S4.** Production process and estimations for the nicarbazin precursor.

| <b>Inputs</b>  |        |      |                                          |
|----------------|--------|------|------------------------------------------|
| Flow           | Amount | Unit | Provider                                 |
| 2-nitroaniline | 317    | g    | Market for 2-nitroaniline, APOS, U - GLO |
| 2-pyridinol    | 109    | g    | Market for 2-pyridinol, APOS, U - GLO    |
| <b>Outputs</b> |        |      |                                          |
| Nicarbazin     | 426    | g    |                                          |

Reaction of HF with silica **Equation S2:**

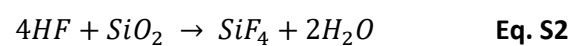

**Table S5.** Energy inputs for 25 g production of Fe-N-C.

| Equipment           | Power Consumption (kW) | Duration of usage (h) | Energy (kWh) |
|---------------------|------------------------|-----------------------|--------------|
| Planetary ball mill | 2.2                    | 1                     | 2.2          |
| Tube furnace        | 7                      | 3                     | 21           |
| Filtration pump     | 0.5                    | 4                     | 2            |
| Dry Oven            | 1                      | 8                     | 8            |
| Tube furnace        | 7                      | 3                     | 21           |

**Table S6.** Production process inputs for Fe-N-C catalyst, 691 g baseline scenario, with provider of LCA data.

| <b>Inputs</b>            |        |      |                                                                       |
|--------------------------|--------|------|-----------------------------------------------------------------------|
| Flow                     | Amount | Unit | Provider/Category                                                     |
| Silica                   | 1.38   | kg   | Market for activated silica, APOS, U - GLO                            |
| Electricity              | 5,393  | MJ   | Market group for electricity, medium voltage, APOS, U - GLO           |
| Hydrogen fluoride        | 2.21   | kg   | Market for hydrogen fluoride, APOS, U - RER                           |
| Iron nitrate nonahydrate | 0.345  | kg   | Table S3                                                              |
| Nicarbazin               | 3.46   | kg   | Table S4                                                              |
| Water deionised          | 138    | kg   | market for water, deionised, APOS, U - Europe without Switzerland     |
| <b>Outputs</b>           |        |      |                                                                       |
| Silica                   | 1.38   | kg   | Market for activated silica, APOS, U - GLO                            |
| Fe-N-C Catalyst          | 691    | g    | This Table                                                            |
| Hydrogen Fluoride        | 2.21   | kg   | Emission to air                                                       |
| Nicarbazin               | 2.76   | kg   | Table S4                                                              |
| Wastewater, average      | 138    | kg   | market for wastewater, average - APOS, U - Europe without Switzerland |



## B. Global Sensitivity Analysis

Total sensitivity indices (equivalent to first-order effects due to linearity of the process inventories) were calculated through sampling 1,000 scenarios from the joint probability distribution of the uncertain factors (process inputs) using low-discrepancy Sobol sequences, then evaluating the mid-point and end-point impacts using OpenLCA linked to python. Note that the input-to-output ratio in the process inventories were kept constant (equal to those in the nominal case) to preserve the mass balances. These scenarios were passed to the software SobolGSA, where the Sobol sensitivity indices were estimated using the RS-HDMR method. The inputs for the sensitivity analysis of Pt/C and Fe-N-C are shown in **Table S7** and **Table S8**. A sensitivity index higher than 0.05 is considered significant here.<sup>1</sup>

**Table S7.** Uncertain factors according to a triangular distribution in the GSA for the baseline Pt/C process.

| Factor      | Acetone (g) | Carbon black (g) | CPA (g) | Electricity (MJ) | Ethylene glycol (g) | Hydrochloric acid (g) | NaOH (g) | H <sub>2</sub> O (kg) |
|-------------|-------------|------------------|---------|------------------|---------------------|-----------------------|----------|-----------------------|
| Lower bound | 614         | 8.0              | 14.4    | 3.54             | 2052                | 254                   | 18.4     | 32.0                  |
| Mode        | 768         | 10.0             | 18.0    | 4.43             | 2565                | 318                   | 23.0     | 40.0                  |
| Upper bound | 921         | 12.0             | 21.6    | 5.32             | 3078                | 382                   | 27.6     | 48.0                  |

**Table S8.** Uncertain factors according to a triangular distribution in the GSA for the baseline Fe-N-C process.

| Factor      | Activated silica (kg) | Electricity (MJ) | Hydrogen fluoride (kg) | Iron Nitrate Nonahydrate (kg) | Nicarbazin (kg) | Water (kg) |
|-------------|-----------------------|------------------|------------------------|-------------------------------|-----------------|------------|
| Lower bound | 1.11                  | 4312             | 1.77                   | 0.28                          | 2.77            | 111        |
| Mode        | 1.38                  | 5393             | 2.21                   | 0.35                          | 3.46            | 138        |
| Upper bound | 1.65                  | 6473             | 2.65                   | 0.42                          | 4.15            | 165        |

## C. Monetization Factors

**Table S9.** Monetary valuation factors for the endpoint impacts. Factors for human health and ecosystem quality obtained from Dong *et al.*<sup>2</sup> Conversion of USD to 2023 values were based on inflation.

| Endpoint Impact   | Unit         | Equivalent Monetary Value Factor (USD 2017 / Unit) | Conversion factor from 2017 to 2023 |
|-------------------|--------------|----------------------------------------------------|-------------------------------------|
| Human health      | DALY         | 108,836                                            |                                     |
| Ecosystem quality | Species·Year | 13,964,286                                         | 1.22                                |
| Resources         | USD 2013     | 1.05                                               |                                     |

## D. TEA Calculations

**Table S10.** Cost of Production for baseline 20 g Pt/C at 500,000 stacks.

| <b>PRODUCTION COST SUMMARY</b>           |                                |      |                        |               | <b>USD kg<sub>Pt/C</sub><sup>-1</sup></b> |
|------------------------------------------|--------------------------------|------|------------------------|---------------|-------------------------------------------|
| <b>RAW MATERIALS</b>                     | Chloroplatinic Acid            |      |                        |               | 13,275                                    |
|                                          | Acetone                        |      |                        |               | 38.4                                      |
|                                          | Carbon Black                   |      |                        |               | 0.75                                      |
|                                          | Ethylene glycol                |      |                        |               | 136.53                                    |
|                                          | HCl                            |      |                        |               | 2.85                                      |
|                                          | Sodium Hydroxide               |      |                        |               | 1.40                                      |
|                                          | Water, deionised               |      |                        |               | 97.31                                     |
|                                          | <b>TOTAL RAW MATERIALS</b>     |      |                        |               |                                           |
| <b>TOTAL UTILITIES</b>                   | Power                          |      |                        |               | 23.46                                     |
| <b>NET RAW MATERIALS &amp; UTILITIES</b> |                                |      |                        |               | <b>13575.69</b>                           |
| <b>DIRECT FIXED COSTS</b>                | Supervisors                    | 1    | Employee               | 29953 USD     | 1.50                                      |
|                                          | Maintenance, Material & Labour | 4.0  | % of ISBL              |               | 7.79                                      |
|                                          | Direct Overhead                | 100  | % Labour & Supervision |               | 1.50                                      |
| <b>TOTAL DIRECT FIXED COSTS</b>          |                                |      |                        |               | <b>10.79</b>                              |
| <b>ALLOCATED FIXED COSTS</b>             | General Plant Overhead         | 50.0 | % Direct Fixed Costs   |               | 5.39                                      |
|                                          | Insurance, Property Tax        | 0.8  | % Total Plant Capital  |               | 2.10                                      |
| <b>TOTAL ALLOCATED FIXED COSTS</b>       |                                |      |                        |               | <b>7.50</b>                               |
| <b>TOTAL FIXED COSTS</b>                 |                                |      |                        |               | <b>18.28</b>                              |
| <b>TOTAL CASH COST</b>                   |                                |      |                        |               | <b>13593.97</b>                           |
|                                          | Depreciation                   | 0.10 | for ISBL & OPC         | 0.05 for OSBL | 29.46                                     |
| <b>COST OF PRODUCTION PER kg</b>         |                                |      |                        |               | <b>13623.43</b>                           |
| <b>COST OF PRODUCTION PER kW</b>         |                                |      |                        |               | <b>USD kW<sup>-1</sup></b><br>3.41        |

**Table S11.** Cost of Production for baseline 691g Fe-N-C at 1,000 PEMFC stacks.

| <b>PRODUCTION COST SUMMARY</b>           |                                |      |                         |        |                   | <b>USD</b>                              |
|------------------------------------------|--------------------------------|------|-------------------------|--------|-------------------|-----------------------------------------|
|                                          |                                |      |                         |        |                   | <b>kg<sub>Fe-N-C</sub><sup>-1</sup></b> |
| <b>RAW MATERIALS</b>                     | Iron Nitrate Nonahydrate       |      |                         |        |                   | 0.42                                    |
|                                          | Nicarbazin                     |      |                         |        |                   | 37.00                                   |
|                                          | Silica                         |      |                         |        |                   | 2.00                                    |
|                                          | Hydrogen fluoride              |      |                         |        |                   | 3.20                                    |
|                                          | Water, deionised               |      |                         |        |                   | 8.02                                    |
| <b>TOTAL RAW MATERIALS</b>               |                                |      |                         |        |                   | 50.64                                   |
| <b>TOTAL UTILITIES</b>                   | Power                          |      |                         |        |                   | 229.81                                  |
| <b>NET RAW MATERIALS &amp; UTILITIES</b> |                                |      |                         |        |                   | 280.45                                  |
|                                          | Supervisors                    | 1    | Employee                | 29,953 | U.S. \$           | 1.50                                    |
|                                          | Maintenance, Material & Labour | 4.0  | % of ISBL <sup>a</sup>  |        |                   | 9.58                                    |
| <b>DIRECT FIXED COSTS</b>                | Direct Overhead                | 100  | % Labour & Supervision  |        |                   | 1.50                                    |
| <b>TOTAL DIRECT FIXED COSTS</b>          |                                |      |                         |        |                   | 12.58                                   |
| <b>ALLOCATED FIXED COSTS</b>             | General Plant Overhead         | 50.0 | % Direct Fixed Costs    |        |                   | 6.29                                    |
|                                          | Insurance, Property Tax        | 0.8  | % Total Plant Capital   |        |                   | 2.54                                    |
| <b>TOTAL ALLOCATED FIXED COSTS</b>       |                                |      |                         |        |                   | 8.83                                    |
| <b>TOTAL FIXED COSTS</b>                 |                                |      |                         |        |                   | 21.41                                   |
| <b>TOTAL CASH COST</b>                   |                                |      |                         |        |                   | 130.22                                  |
|                                          | Depreciation                   | 0.10 | ISBL & OPC <sup>b</sup> | 0.05   | OSBL <sup>c</sup> | 35.80                                   |
| <b>COST OF PRODUCTION PER kg</b>         |                                |      |                         |        |                   | 337.66                                  |
| <b>COST OF PRODUCTION PER kW</b>         |                                |      |                         |        |                   | <b>USD kW<sup>-1</sup></b><br>2.92      |

<sup>a</sup> Inside battery limits

<sup>b</sup> Other project costs

<sup>c</sup> Outside battery limits

**Table S12.** Cost of 80 kW PEMFC components for  $F = 86.4\%$  learning curve of Pt/C cathode system, with applied and calculated  $F$ ,  $r$ , and  $A$  values.

| Production Rate           | Cathode Catalyst     | Membrane + GDL | Bipolar Plates | Gaskets | Stack + Conditioning | Anode Catalyst | Total Cost           |
|---------------------------|----------------------|----------------|----------------|---------|----------------------|----------------|----------------------|
| Stacks year <sup>-1</sup> | USD kW <sup>-1</sup> |                |                |         |                      |                | USD kW <sup>-1</sup> |
| 1,000                     | 12.61                | 33.05          | 15.65          | 14.23   | 3.61                 | 2.55           | 81.70                |
| 10,000                    | 7.76                 | 15.75          | 5.76           | 6.78    | 3.05                 | 1.57           | 40.66                |
| 20,000                    | 6.70                 | 12.60          | 4.26           | 5.42    | 2.89                 | 1.36           | 33.23                |
| 50,000                    | 5.53                 | 9.38           | 2.86           | 4.04    | 2.70                 | 1.12           | 25.63                |
| 100,000                   | 4.77                 | 7.50           | 2.12           | 3.23    | 2.57                 | 0.97           | 21.16                |
| 500,000                   | 3.40                 | 4.47           | 1.05           | 1.92    | 2.28                 | 0.69           | 13.81                |
| $F$ (%)                   | 86.4                 | 80.0           | 74.0           | 80.0    | 95.0                 | 86.4           | -                    |
| $-r$ (-)                  | -0.21                | -0.32          | -0.43          | -0.32   | -0.07                | -0.21          | -                    |
| $A$ (-)                   | 4330                 | 24437          | 25166          | 10518   | 482                  | 876            | -                    |

**Table S13.** Cost of 80 kW PEMFC components for learning curve of PtCo/C cathode system, with applied and calculated  $F$ ,  $r$ , and  $A$  values.

| Production Rate           | Cathode Catalyst     | Membrane + GDL | Bipolar Plates | Gaskets | Stack + Conditioning | Anode Catalyst | Total Cost           |
|---------------------------|----------------------|----------------|----------------|---------|----------------------|----------------|----------------------|
| Stacks year <sup>-1</sup> | USD kW <sup>-1</sup> |                |                |         |                      |                | USD kW <sup>-1</sup> |
| 1,000                     | 14.58                | 33.05          | 15.65          | 14.23   | 3.61                 | 2.55           | 83.66                |
| 10,000                    | 8.97                 | 15.75          | 5.76           | 6.78    | 3.05                 | 1.57           | 41.87                |
| 20,000                    | 7.75                 | 12.60          | 4.26           | 5.42    | 2.89                 | 1.36           | 34.28                |
| 50,000                    | 6.39                 | 9.38           | 2.86           | 4.04    | 2.70                 | 1.12           | 26.49                |
| 100,000                   | 5.52                 | 7.50           | 2.12           | 3.23    | 2.57                 | 0.97           | 21.90                |
| 500,000                   | 3.93                 | 4.47           | 1.05           | 1.92    | 2.28                 | 0.69           | 14.34                |
| $F$ (%)                   | 86.4                 | 80.0           | 74.0           | 80.0    | 95.0                 | 86.4           | -                    |
| $-r$ (-)                  | -0.21                | -0.32          | -0.43          | -0.32   | -0.07                | -0.21          | -                    |
| $A$ (-)                   | 5005                 | 24437          | 25166          | 10518   | 482                  | 876            | -                    |



**Table S14.** Cost of 80 kW PEMFC components for  $F = 86.4\%$  learning curve of Fe-N-C cathode system, with applied and calculated  $F$ ,  $r$ , and  $A$  values.

| Production Rate           | Cathode Catalyst     | Membrane + GDL | Bipolar Plates | Gaskets | Stack + Conditioning | Anode Catalyst | Total Cost           |
|---------------------------|----------------------|----------------|----------------|---------|----------------------|----------------|----------------------|
| Stacks year <sup>-1</sup> | USD kW <sup>-1</sup> |                |                |         |                      |                | USD kW <sup>-1</sup> |
| 1,000                     | 2.92                 | 129.69         | 61.41          | 55.82   | 14.18                | 9.91           | 273.93               |
| 10,000                    | 1.79                 | 61.80          | 22.59          | 26.60   | 11.95                | 6.10           | 130.83               |
| 20,000                    | 1.55                 | 49.44          | 16.71          | 21.28   | 11.36                | 5.27           | 105.61               |
| 50,000                    | 1.28                 | 36.81          | 11.23          | 15.84   | 10.61                | 4.34           | 80.11                |
| 100,000                   | 1.10                 | 29.45          | 8.31           | 12.67   | 10.08                | 3.75           | 65.37                |
| 500,000                   | 0.786                | 17.54          | 4.13           | 7.55    | 8.95                 | 2.67           | 41.63                |
| $F$ (%)                   | 86.4                 | 80.0           | 74.0           | 80.0    | 95.0                 | 86.4           | -                    |
| $-r$ (-)                  | -0.21                | -0.32          | -0.43          | -0.32   | -0.07                | -0.21          | -                    |
| $A$ (-)                   | 1001                 | 95892          | 98753          | 41273   | 1891                 | 3404           | -                    |

## E. LCA Results

### *Global Sensitivity Analysis*

Material and electricity contribution in global sensitivity analysis for Fe-N-C and Pt/C are provided in **Table S15-Table S16**.

**Table S15.** Total Sobol sensitivity indices for midpoint global sensitivity analysis of Pt/C baseline.

| Midpoint Impact Method                           | Acetone | Carbon black | CPA    | Electricity | Ethylene glycol | HCl    | NaOH | H <sub>2</sub> O |
|--------------------------------------------------|---------|--------------|--------|-------------|-----------------|--------|------|------------------|
| Global warming (kg CO <sub>2</sub> -Eq)          | 0.0001  | 0            | 0.6346 | 0.3651      | 0.0001          | 0.0001 | 0    | 0                |
| Acidification potential (kg SO <sub>2</sub> -Eq) | 0       | 0            | 0.9972 | 0.0027      | 0               | 0.0001 | 0    | 0                |
| Marine eutrophication (kg N-Eq)                  | 0       | 0            | 0.7673 | 0.2326      | 0               | 0.0001 | 0    | 0                |
| Freshwater eutrophication (kg P-Eq)              | 0       | 0            | 0.9169 | 0.083       | 0               | 0.0001 | 0    | 0                |
| Human toxicity potential (kg 1,4-DCB-Eq)         | 0       | 0            | 0.9793 | 0.0206      | 0               | 0.0001 | 0    | 0                |
| Fossil resource scarcity (kg oil-Eq)             | 0.0002  | 0            | 0.7458 | 0.2537      | 0.0002          | 0.0001 | 0    | 0                |
| Mineral resource scarcity (kg Cu-Eq)             | 0       | 0            | 0.9998 | 0.0001      | 0               | 0.0001 | 0    | 0                |

**Table S16.** Total Sobol sensitivity indices of midpoint global sensitivity analysis of Fe-N-C baseline.

| Midpoint Impact Method                           | Activated Silica | Electricity | HF     | Iron Nitrate Nonahydrate | Nicarbazin | H <sub>2</sub> O |
|--------------------------------------------------|------------------|-------------|--------|--------------------------|------------|------------------|
| Global warming (kg CO <sub>2</sub> -Eq)          | 0                | 0.9994      | 0.0001 | 0                        | 0.0001     | 0                |
| Acidification Potential (kg SO <sub>2</sub> -Eq) | 0.0089           | 0.6135      | 0.3668 | 0                        | 0          | 0                |
| Marine eutrophication (kg N-Eq)                  | 0                | 0.4086      | 0      | 0.0001                   | 0.5912     | 0                |
| Freshwater eutrophication (kg P-Eq)              | 0                | 0.9998      | 0.0001 | 0                        | 0.0001     | 0                |
| Human toxicity potential (kg 1,4-DCB-Eq)         | 0                | 0.0064      | 0.9936 | 0                        | 0          | 0                |
| Fossil resource scarcity (kg oil-Eq)             | 0                | 0.9987      | 0.0002 | 0                        | 0.0011     | 0                |
| Mineral resource scarcity (kg Cu-Eq)             | 0.0002           | 0.964       | 0.0244 | 0.0001                   | 0.0103     | 0                |

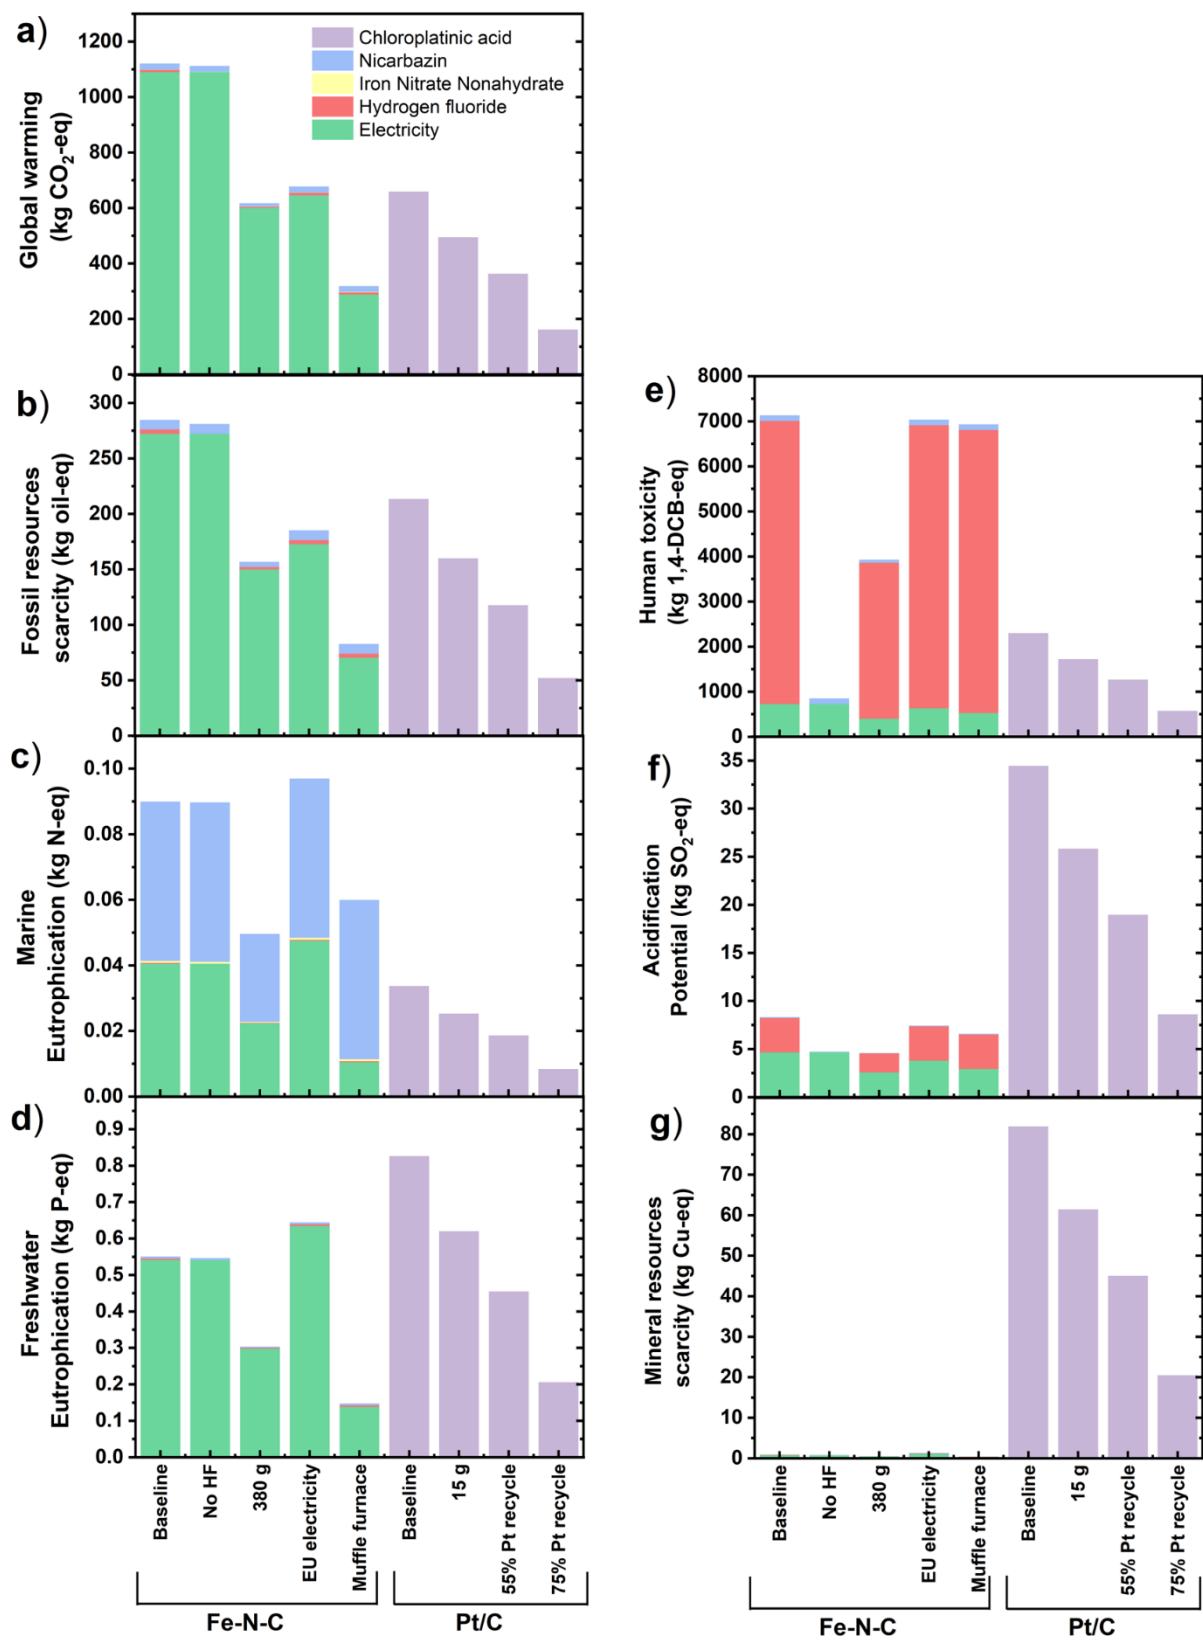

**Figure S1.** Scenarios of Fe-N-C (baseline, no HF, 380 g, EU electricity) and Pt/C (baseline, 15 g, 55% and 75% Pt recycling) for midpoints categories: (a) Global warming (kg CO<sub>2</sub>-eq). (b) Fossil resource scarcity. (c) Marine Eutrophication (kg N-eq). (d) Freshwater eutrophication (kg P-eq) (e) Human Toxicity (kg 1,4-DCB-eq). (f) Acidification potential (kg SO<sub>2</sub>-eq). (g) Mineral resource scarcity (kg Cu-eq).

**Table S17.** Midpoint impact results for baseline and varying scenarios.

| Midpoint Impact Method                           | Fe-N-C   |       |       |                |                | Pt/C     |                  |                  |       |
|--------------------------------------------------|----------|-------|-------|----------------|----------------|----------|------------------|------------------|-------|
|                                                  | Baseline | No HF | 380 g | EU electricity | Muffle furnace | Baseline | 75% Pt recycling | 55% Pt recycling | 15 g  |
| Global warming (kg CO <sub>2</sub> -Eq)          | 1,130    | 1,120 | 623   | 677            | 319            | 659      | 162              | 363              | 494   |
| Fossil resource scarcity (kg oil-Eq)             | 286      | 282   | 157   | 185            | 83             | 213      | 52               | 118              | 160   |
| Marine eutrophication (kg N-Eq)                  | 0.09     | 0.09  | 0.05  | 0.10           | 0.06           | 0.03     | 0.01             | 0.02             | 0.03  |
| Freshwater eutrophication (kg P-Eq)              | 0.55     | 0.55  | 0.30  | 0.64           | 0.15           | 0.83     | 0.21             | 0.46             | 0.62  |
| Human toxicity potential (kg 1,4-DCB-Eq)         | 7,140    | 856   | 3,930 | 7,030          | 7,138          | 2,300    | 571              | 1,260            | 1,720 |
| Acidification Potential (kg SO <sub>2</sub> -Eq) | 8.36     | 3.79  | 4.60  | 7.44           | 6.58           | 34.4     | 8.6              | 18.9             | 25.8  |
| Mineral resource scarcity (kg Cu-Eq)             | 1.01     | 0.90  | 0.56  | 1.28           | 0.45           | 81.9     | 20.5             | 45.0             | 61.4  |

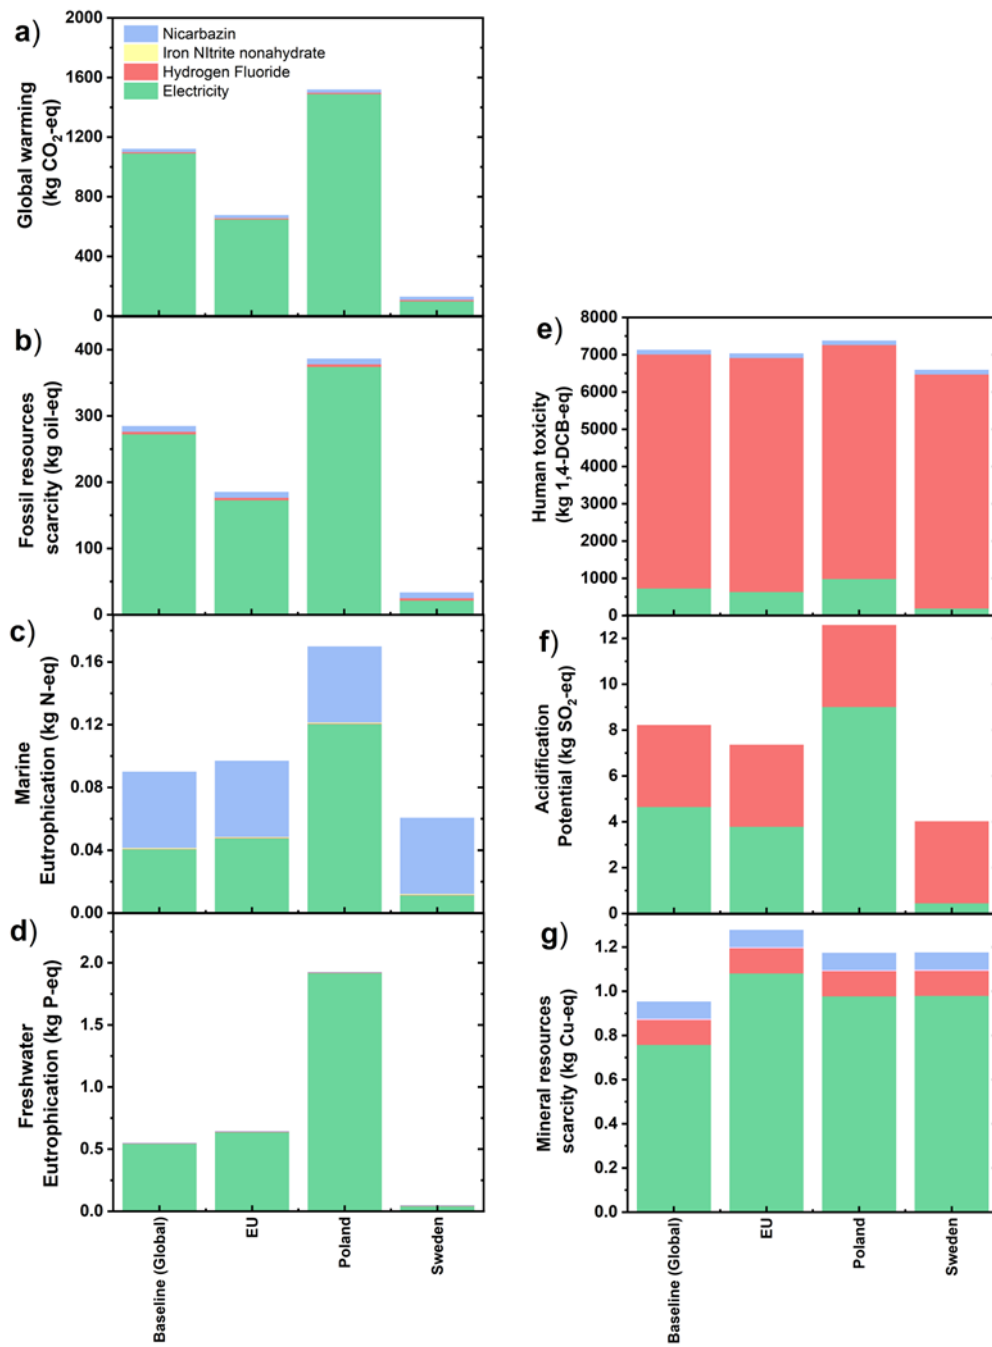

**Figure S2.** Midpoint impacts for Fe-N-C for different electricity mix scenarios.

**Table S18.** Midpoint impact results for baseline (global electricity) and EU, Poland, and Sweden electricity mix for Fe-N-C.

| Midpoint Impact Method                           | Fe-N-C                              |                |                       |                       |
|--------------------------------------------------|-------------------------------------|----------------|-----------------------|-----------------------|
|                                                  | Baseline<br>(Global<br>electricity) | EU electricity | Poland<br>electricity | Sweden<br>electricity |
| Global warming (kg CO <sub>2</sub> -Eq)          | 1130                                | 677            | 1520                  | 129                   |
| Fossil resource scarcity (kg oil-Eq)             | 286                                 | 185            | 387                   | 34                    |
| Marine eutrophication (kg N-Eq)                  | 0.09                                | 0.10           | 0.17                  | 0.06                  |
| Freshwater eutrophication (kg P-Eq)              | 0.55                                | 0.64           | 1.93                  | 0.05                  |
| Human toxicity potential (kg 1,4-DCB-Eq)         | 7140                                | 7030           | 7380                  | 6590                  |
| Acidification Potential (kg SO <sub>2</sub> -Eq) | 8.36                                | 7.44           | 12.7                  | 4.11                  |
| Mineral resource scarcity (kg Cu-Eq)             | 1.01                                | 1.28           | 1.17                  | 1.17                  |

**Table S19.** Midpoint contribution to endpoints for baseline scenario.

| Impact Method Contribution                        | Fe-N-C | Pt/C  |
|---------------------------------------------------|--------|-------|
| Human Health (10 <sup>-3</sup> DALY)              | 2.01   | 3.16  |
| Climate Change                                    | 1.04   | 0.62  |
| Human Toxicity                                    | 0.47   | 1.16  |
| Ionising Radiation                                | 0.00   | 0.00  |
| Ozone Depletion                                   | 0.00   | 0.00  |
| Particulate Matter Formation                      | 0.50   | 1.38  |
| Photochemical Oxidant Formation                   | 0.00   | 0.00  |
| Resources (USD 2013)                              | 54.66  | 59.41 |
| Fossil resources scarcity                         | 54.43  | 40.47 |
| Mineral resources scarcity                        | 0.23   | 18.94 |
| Ecosystem Quality (10 <sup>-5</sup> Species·Year) | 0.61   | 5.65  |
| Freshwater ecotoxicity                            | 0.00   | 0.02  |
| Freshwater eutrophication                         | 0.04   | 0.06  |
| Global warming, freshwater ecosystem              | 0.00   | 0.00  |
| Global warming, terrestrial ecosystem             | 0.32   | 0.18  |
| Land use                                          | 0.12   | 4.56  |
| Marine ecotoxicity                                | 0.00   | 0.00  |
| Marine eutrophication                             | 0.00   | 0.00  |
| Ozone formation, terrestrial ecosystem            | 0.03   | 0.12  |
| Acidification potential                           | 0.08   | 0.69  |
| Terrestrial ecotoxicity                           | 0.00   | 0.00  |
| Water consumption, aquatic ecosystem              | 0.00   | 0.00  |
| Water consumption, terrestrial ecosystem          | 0.01   | 0.01  |



**Table S20.** Total Sobol sensitivity indexes for endpoint global sensitivity analysis of Pt/C baseline.

| Endpoint Impact Method           | Acetone | Carbon black | CPA    | Electricity | Ethylene glycol | HCl    | NaOH | H <sub>2</sub> O |
|----------------------------------|---------|--------------|--------|-------------|-----------------|--------|------|------------------|
| Human health (DALY)              | 0       | 0            | 0.9829 | 0.0170      | 0               | 0.0001 | 0    | 0                |
| Ecosystem quality (species·Year) | 0.0008  | 0            | 0.7615 | 0.2370      | 0.0007          | 0.0001 | 0    | 0                |
| Resources (USD 2013)             | 0.0004  | 0            | 0.8714 | 0.1277      | 0.0004          | 0.0001 | 0    | 0                |

**Table S21.** Total Sobol sensitivity indexes for endpoint global sensitivity analysis of Fe-N-C baseline.

| Endpoint Impact Method           | Activated Silica | Electricity | HF     | Iron Nitrate Nonahydrate | Nicarbazin | H <sub>2</sub> O |
|----------------------------------|------------------|-------------|--------|--------------------------|------------|------------------|
| Human health (DALY)              | 0.0011           | 0.9428      | 0.0561 | 0                        | 0.0034     | 0                |
| Ecosystem quality (species-year) | 0                | 0.9954      | 0.0007 | 0                        | 0.0039     | 0                |
| Resources (USD 2013)             | 0                | 0.9955      | 0.0006 | 0                        | 0.0039     | 0                |

**Table S22.** Endpoint impact results for baseline and different scenarios.

| Endpoint Impact Method                            | Fe-N-C   |       |       |                |                | Pt/C     |                  |                  |      |
|---------------------------------------------------|----------|-------|-------|----------------|----------------|----------|------------------|------------------|------|
|                                                   | Baseline | No HF | 380 g | EU electricity | Muffle furnace | Baseline | 75% Pt recycling | 55% Pt recycling | 15 g |
| Human health (10 <sup>-3</sup> DALY)              | 2.01     | 1.68  | 1.10  | 1.49           | 1.04           | 3.16     | 2.37             | 1.74             | 0.79 |
| Ecosystem quality (10 <sup>-5</sup> species·year) | 0.61     | 0.60  | 0.34  | 0.46           | 0.18           | 5.65     | 4.24             | 3.11             | 1.41 |
| Resources (USD 2013)                              | 54.7     | 53.4  | 30.1  | 35.3           | 17.4           | 59.4     | 44.6             | 32.8             | 14.4 |

**Table S23.** Endpoint impact results for baseline and scenarios considering different production location electricity mix for Fe-N-C.

| Endpoint Impact Method                               | Fe-N-C                              |                |                       |                       |
|------------------------------------------------------|-------------------------------------|----------------|-----------------------|-----------------------|
|                                                      | Baseline<br>(Global<br>electricity) | EU electricity | Poland<br>electricity | Sweden<br>electricity |
| Human health (10 <sup>-3</sup><br>DALY)              | 2.01                                | 1.49           | 2.72                  | 0.48                  |
| Ecosystem quality<br>(10 <sup>-5</sup> species-year) | 0.61                                | 0.46           | 1.03                  | 0.17                  |
| Resources (USD 2013)                                 | 54.7                                | 35.3           | 34.7                  | 10.5                  |

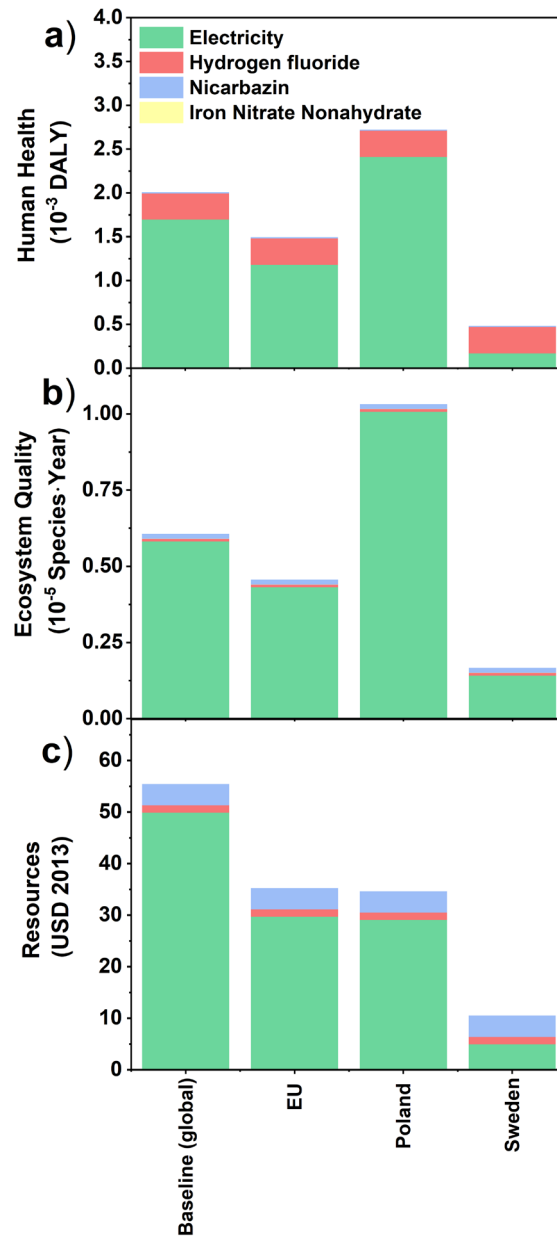

**Figure S3.** Endpoint scenarios for Fe-N-C for different electricity mix supplies.

## F. TEA Results

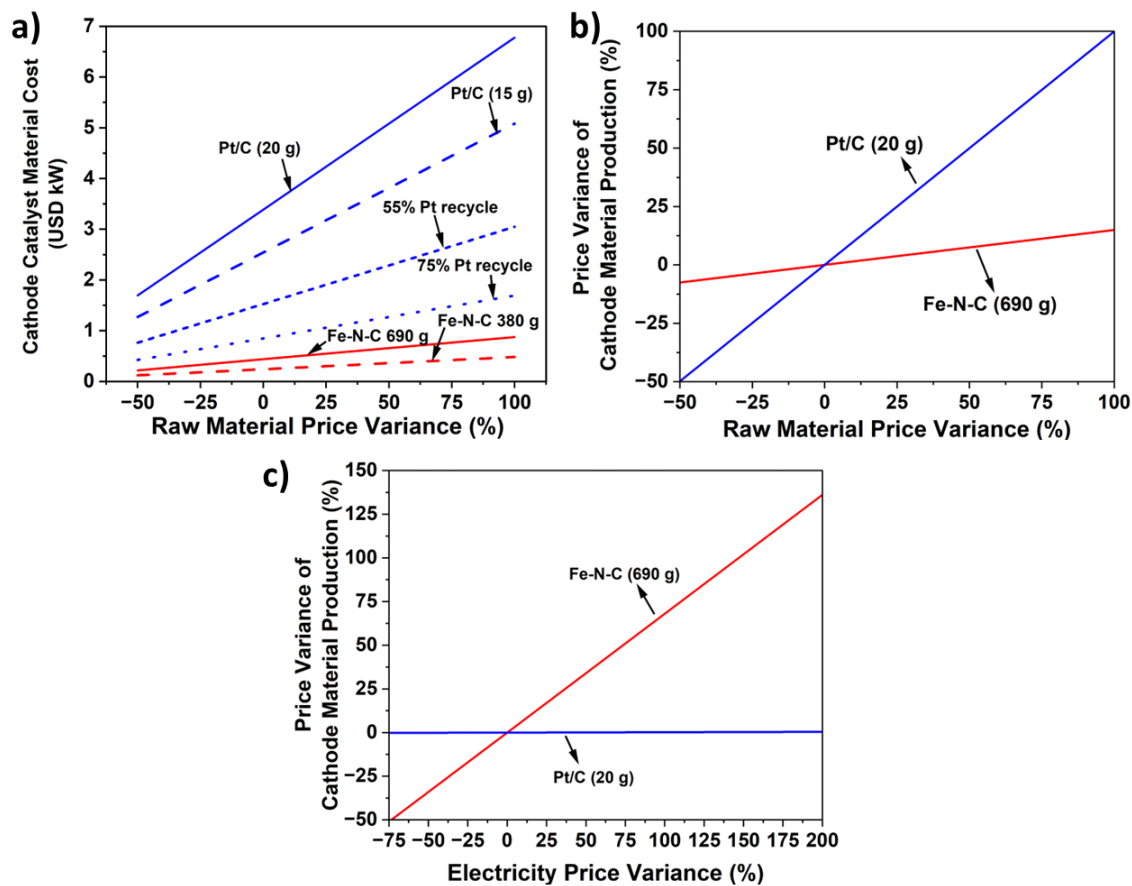

**Figure S4.** Sensitivity analysis on catalyst material feedstock price variance for a.) cathode catalyst material costs for baseline and varying catalyst scenarios and b.) catalyst production cost variance. c.) Electricity price variance on catalyst production cost variance.

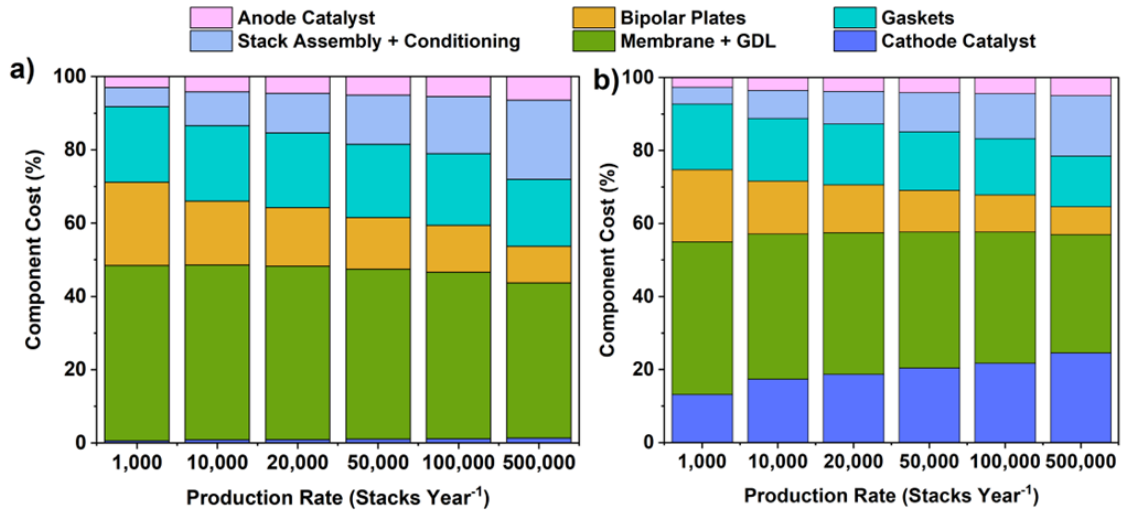

Figure S5. Percentage breakdown of 80 kW PEMFC component costs with cathode (a) Fe-N-C. (b) Pt/C.

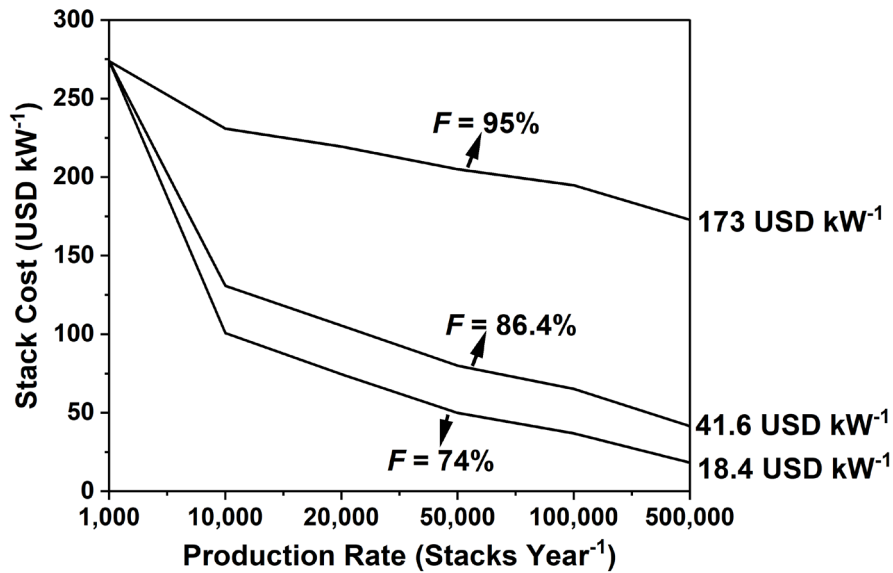

Figure S6. Different  $F$  values applied for baseline Fe-N-C based 80 kW PEMFC stack. For  $F = 74$  and  $95\%$ , this  $F$  value is applied to all PEMFC components.  $F = 86.4\%$  is only applied to the catalysts, with other values found in Table S20.

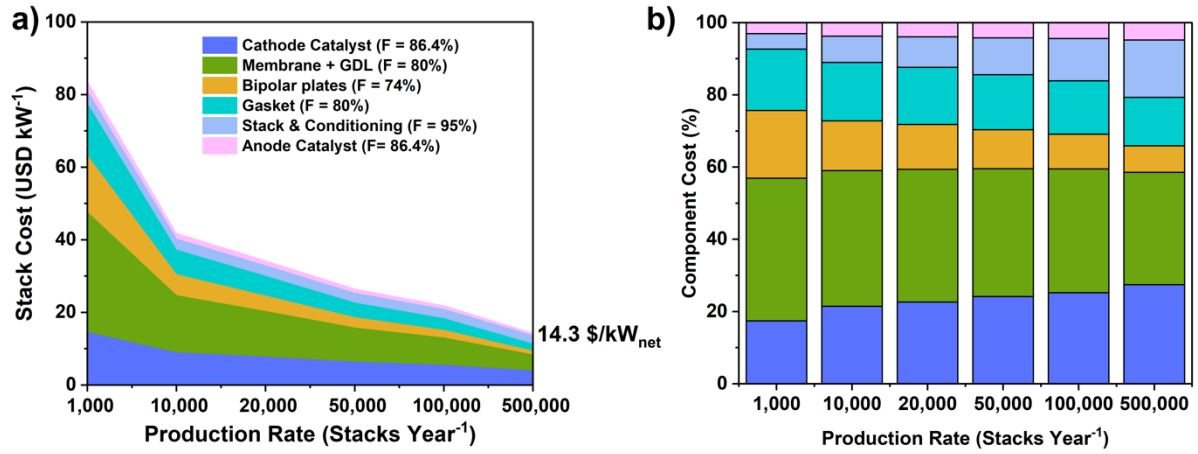

**Figure S7.** a.) Learning curve of 80 kW PEMFC stack containing cathode PtCo/C. b.) Corresponding percentage breakdown of component costs.



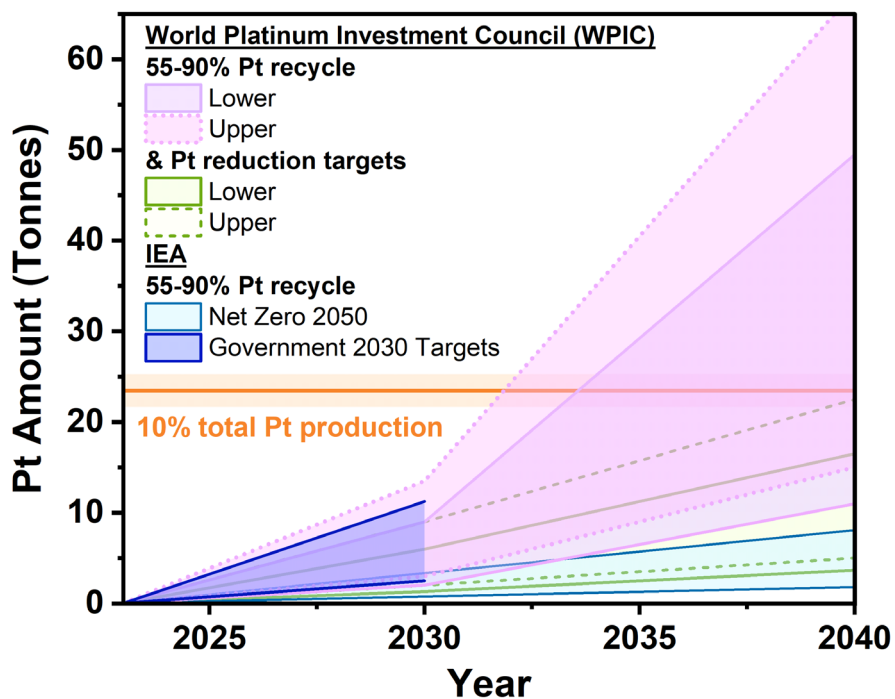

**Figure S8.** Different scenarios of Pt consumption over time based on PEMFC electric vehicle (FCEV) production from World Platinum Investment Council (WPIC)<sup>3</sup> of lower (11 million FCEV) and upper (15 million FCEV) by 2040. Also, IEA 2050 net zero scenario (equivalent to 2.85 million FCEV)<sup>4</sup> and 2030 government targets (2.5 million FCEV).<sup>5</sup> 10% annual Pt consumption limit for deployment of new technology based on ref,<sup>6</sup> with error representing variation in Pt production between 2017-2023.<sup>7</sup>

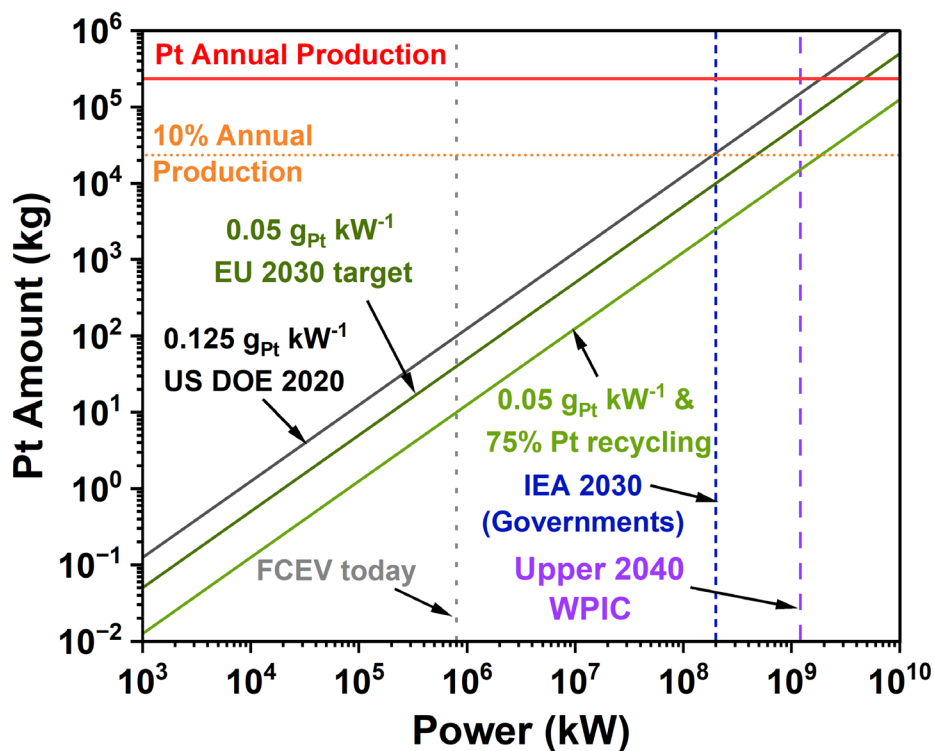

**Figure S9.** Amount of Pt required for PEMFC power at different Pt specific power density (US DOE 2020,<sup>8</sup> EU 2030<sup>9</sup> and 75% Pt recycling targets<sup>10</sup>) as a function of scale. Assumed 80 kW fuel cell electricity vehicle production. IEA 2030 Government targets (vertical dash blue)<sup>5</sup> and upper limit scenario given by upper 2040 WPIC (vertical dash purple).<sup>3</sup> Figure design is inspired from Hubert et al.<sup>11</sup>

## G. Discussion and Literature Comparison

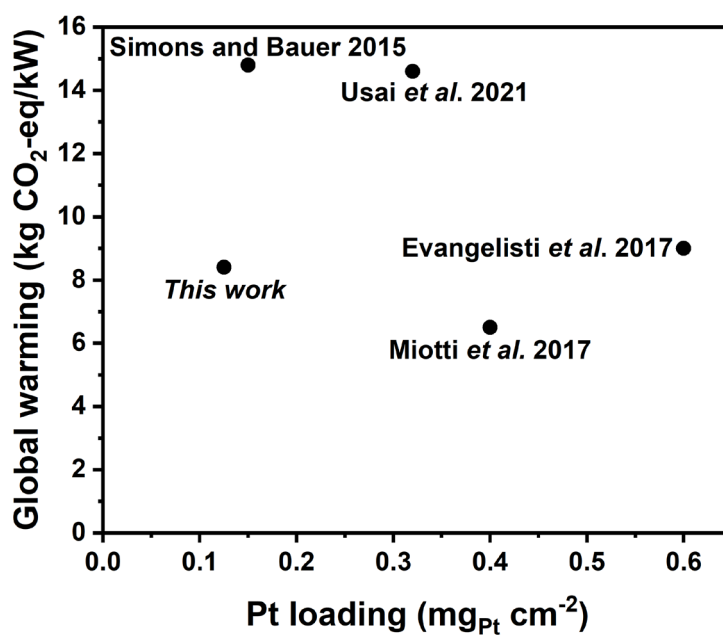

**Figure S10.** Calculated Global warming impact per kW for assumed Pt loadings in references (Usai et al. 2021,<sup>12</sup> Evangelisti et al. 2017,<sup>13</sup> Miotti et al. 2017,<sup>14</sup> Simons and Bauer 2015<sup>15</sup>) and this work.

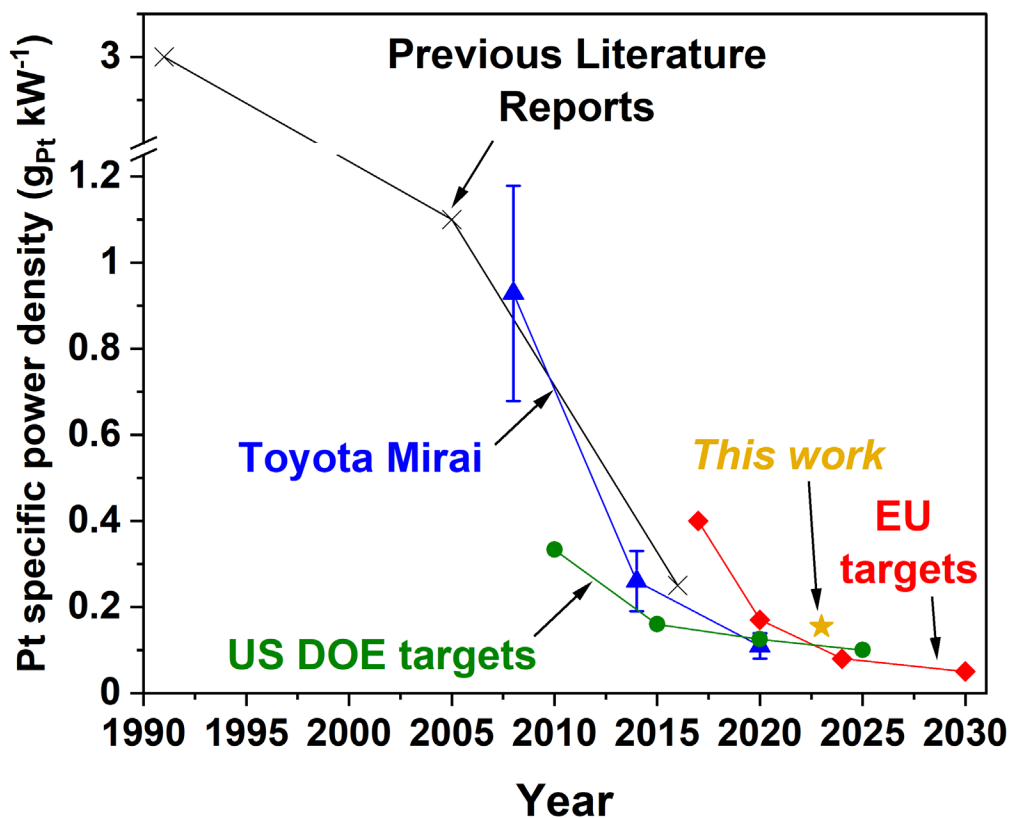

**Figure S11.** Reported Pt specific power density and targets over time. Toyota Mirai based on reported reductions,<sup>16</sup> with g<sub>Pt</sub> kW<sup>-1</sup> based on calculations from Gröger et al.<sup>17</sup> Targets reported for EU<sup>9</sup> and US DOE.<sup>8,18</sup> Previous literature reports from 1991,<sup>19</sup> 2005,<sup>20</sup> and 2016.<sup>21</sup> The reported values and targets are based on different operation conditions.

## References

- 1 X. Y. Zhang, M. N. Trame, L. J. Lesko and S. Schmidt, *CPT: Pharmacometrics and Systems Pharmacology*, 2015, **4**, 69–79.
- 2 Y. Dong, M. Hauschild, H. Sørup, R. Rousselet and P. Fantke, *Journal of Cleaner Production*, 2019, **209**, 538–549.
- 3 T. Raymond, E. Sterck and B. Clifford, *PLATINUM ESSENTIALS Fuel cell electric vehicles are forecast to drive material long-term demand growth for platinum*, 2022.
- 4 International Energy Agency, *World Energy Outlook*, 2022.
- 5 International Energy Agency, *The Future of Hydrogen*, 2019.
- 6 A. B. Laursen, J. Sehested, I. Chorkendorff and P. C. K. Vesborg, *Chinese Journal of Catalysis*, 2018, **39**, 16–26.
- 7 Johnson Matthey, *PGM market report*, May, 2022.
- 8 US DOE - Hydrogen and Fuel Cell Technologies Office, *Hydrogen and Fuel Cell Technologies Office Multi-Year Research, Development, and Demonstration Plan. Section 3.4: Fuel Cells*, 2017.
- 9 *Fuel Cells and Hydrogen 2 Joint Undertaking Key Performance Indicators*, 2021.
- 10 M. Mori, A. Lotric and R. Stropnik, *D4.3 Case studies with new strategies in dismantling and recycling stage (HyTechCycling)*, Ljubljana, 2019.
- 11 M. A. Hubert, L. A. King and T. F. Jaramillo, *ACS Energy Letters*, 2022, **7**, 17–23.
- 12 L. Usai, C. R. Hung, F. Vásquez, M. Windsheimer, O. S. Burheim and A. H. Strømman, *Journal of Cleaner Production*, 2021, **280**, 125086.
- 13 S. Evangelisti, C. Tagliaferri, D. J. L. Brett and P. Lettieri, *Journal of Cleaner Production*, 2017, **142**, 4339–4355.
- 14 M. Miotti, J. Hofer and C. Bauer, *International Journal of Life Cycle Assessment*, 2017, **22**, 94–110.
- 15 A. Simons and C. Bauer, *Applied Energy*, 2015, **157**, 884–896.
- 16 T. Yoshizumi, H. Kubo and M. Okumura, *SAE Technical Papers*, 2021, **2021-01-0740**, 1–6.
- 17 O. Gröger, H. A. Gasteiger and J.-P. Suchsland, *Journal of The Electrochemical Society*, 2015, **162**, A2605–A2622.
- 18 B. D. James, J. M. Huya-Kouadio, C. Houchins and D. A. DeSantis, *Mass Production Cost Estimation of Direct H<sub>2</sub> PEM Fuel Cell Systems for Transportation Applications: 2018 Update*, 2018.
- 19 D. H. Swan, O. A. Velez, I. J. Kakwan, A. C. Ferreira, S. Srinivasan and A. J. Appleby, in *Project Hydrogen'91, Technical Proceedings, American Academy of Science*, Independence, USA, 1991.
- 20 H. A. Gasteiger, S. S. Kocha, B. Sompalli and F. T. Wagner, *Applied Catalysis B: Environmental*, 2005, **56**, 9–35.
- 21 A. Kongkanand and M. F. Mathias, *Journal of Physical Chemistry Letters*, 2016, **7**, 1127–1137.
